# Supplementary material for: Normal saline remodels the omentum and stimulates its receptivity for transcoelomic metastasis
Source: JCI journal article supplement (doi:10.1172/jci.insight.167336), 2023-06-21
Supplement: sd1 [file 1]

## **Normal saline remodels the omentum and stimulates its receptivity for transcoelomic metastasis**

Hironari Akasaka, WonJae Lee, Song Yi Ko, Ernst Lengyel, Honami Naora

### **SUPPLEMENTAL MATERIALS**

Supplemental Figure 1. Effect of normal saline on peritoneal pH.

Supplemental Figure 2. Analysis of mesothelial cells, CD45<sup>+</sup> cells, and lymphatic structures.

Supplemental Figure 3. Effect of normal saline on immune cell populations in the omentum.

Supplemental Figure 4. Morphology of omental monocyte/macrophage populations.

Supplemental Figure 5. Effect of normal saline on immune cell populations in mesenteric and gonadal fat tissues.

Supplemental Figure 6. Distribution of Ly6C, CCR2 and CX3CR1 in CD11b<sup>Int</sup>F4/80<sup>Lo</sup> subpopulations.

Supplemental Figure 7. Analysis of *Cx3cr1*<sup>+ /GFP</sup> and *Cx3cr1*<sup>GFP /GFP</sup> mice and CX3CR1<sup>+</sup> SPM-like cells.

Supplemental Figure 8. Effects of LRS on peritoneal pH and lactate levels.

Supplemental Figure 9. Effect of LRS on immune cell populations and histology of fat tissues.

Supplemental Table 1: Characteristics of body fluids, normal saline and LRS.

Supplemental Table 2. Sources and concentrations of antibodies.

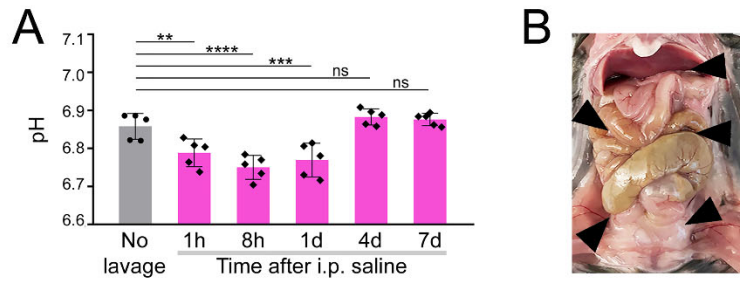

**Supplemental Figure 1. Effect of normal saline on peritoneal pH.**

(A) pH in the peritoneal cavity of adult female C57BL/6 mice at 1 hour and 8 hours, and at 1, 4 and 7 days, following i.p. administration of normal saline (12.5 mL/kg) ( $n = 5$  mice at each time-point). (B) For each mouse at a given time-point, an average pH was calculated from measurements taken at five sites indicated by arrowheads. ns, not significant,  $**P < 0.01$ ,  $***P < 0.001$ ,  $****P < 0.0001$ , by Dunnett's multiple comparisons test compared to untreated mice (no lavage) in A.

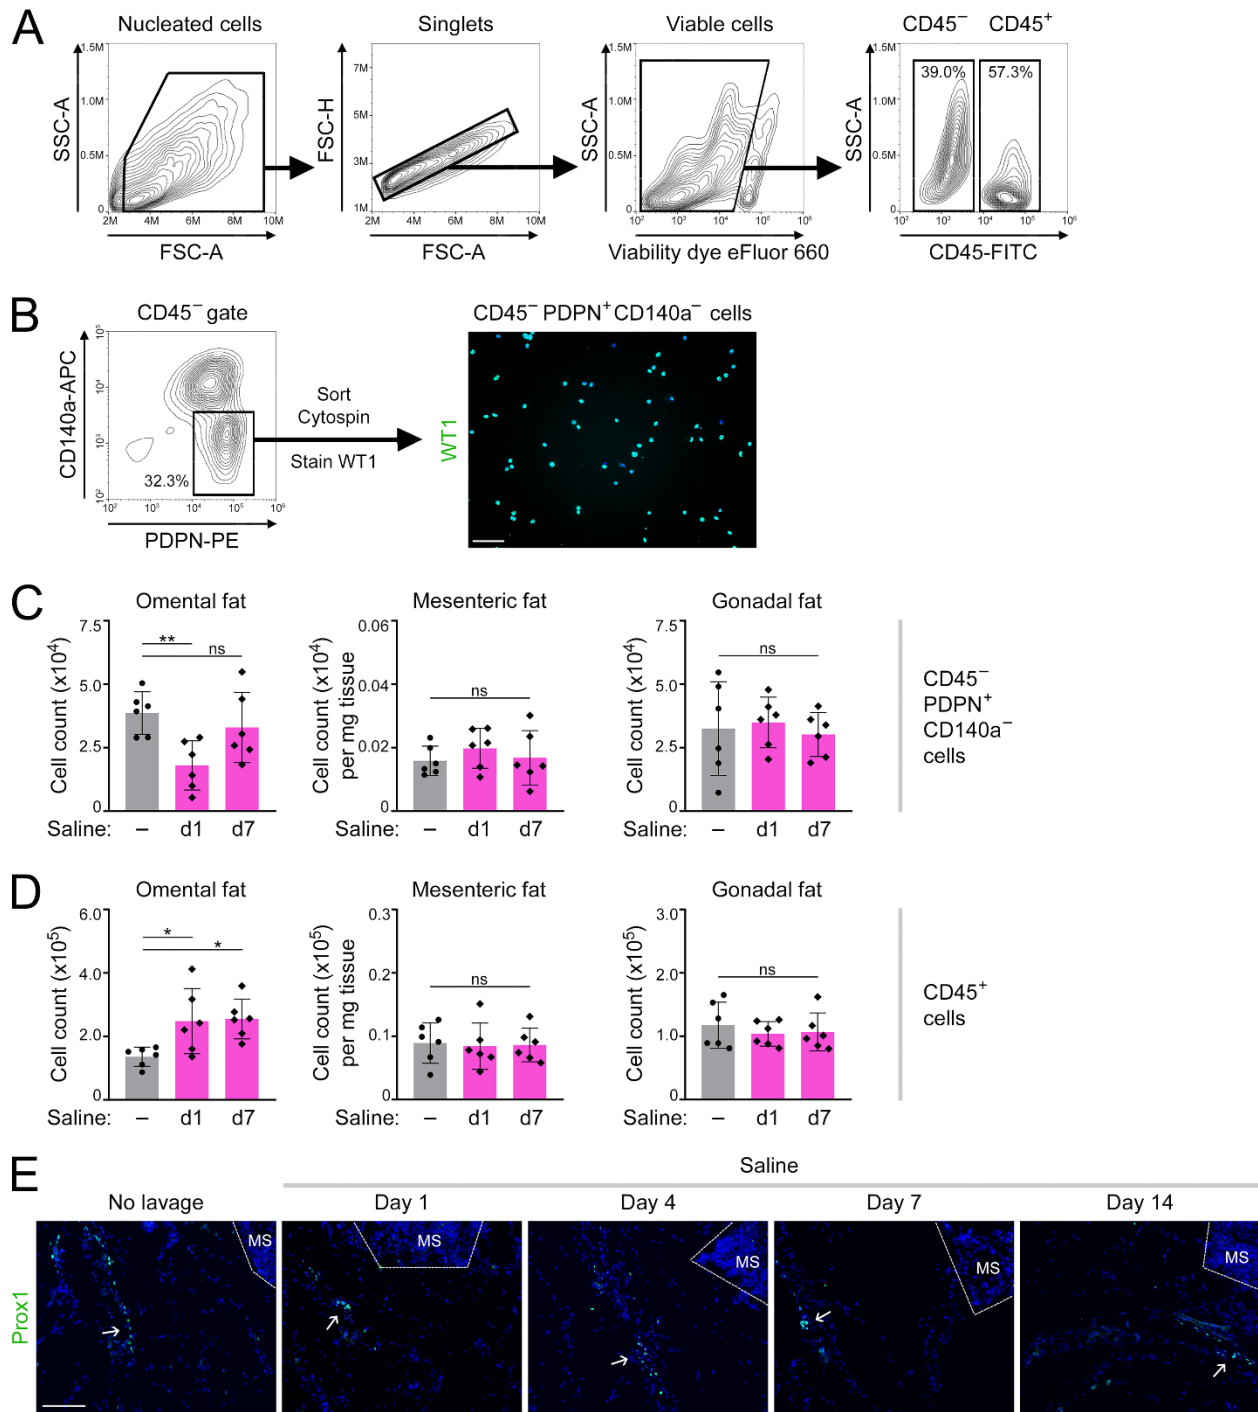

**Supplemental Figure 2. Analysis of mesothelial cells, CD45<sup>+</sup> cells, and lymphatic structures.**

(A) Flow cytometry gating strategy for analyzing mouse omentum. (B) PDPN and CD140a staining within gated omental CD45<sup>-</sup> cells. CD45<sup>-</sup> PDPN<sup>+</sup> CD140a<sup>-</sup> cells were sorted, stained for WT1, and counterstained with DAPI. Scale bar, 100  $\mu$ m. (C and D) Numbers of CD45<sup>-</sup> PDPN<sup>+</sup> CD140a<sup>-</sup> cells (C) and CD45<sup>+</sup> cells (D) per omental fat band (greater and lesser omentum combined), per mg of mesenteric fat tissue, and per gonadal fat pad (two lobes combined) in untreated mice and at day 1 and day 7 following i.p. administration of normal saline ( $n = 6$  per group). (E) Representative images of staining of Prox1 (denoted by arrows), a master transcriptional regulator of lymphatic development, in the omentum following saline administration. Milky spots (MS) are outlined. Scale bar, 100  $\mu$ m. Adult female C57BL/6 mice were used in A-E. \* $P < 0.05$ , \*\* $P < 0.01$ , by Dunnett's multiple comparisons test compared to untreated mice in C and D.

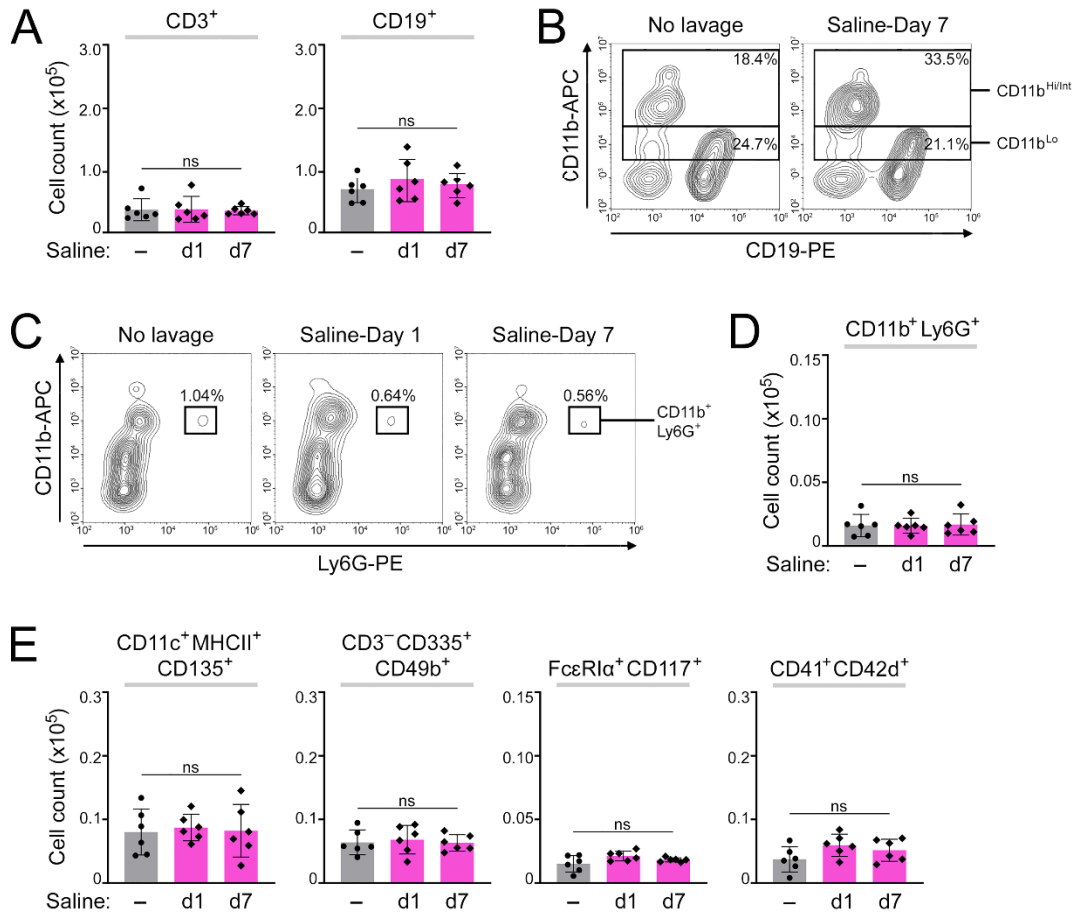

**Supplemental Figure 3. Effect of normal saline on immune cell populations in the omentum.**

Analysis of immune cell populations in omental tissues of untreated mice and at day 1 and day 7 following i.p. administration of normal saline ( $n = 6$  per group). Adult female C57BL/6 mice were used. **(A)** Numbers of T cells (CD3<sup>+</sup>) and B cells (CD19<sup>+</sup>) per omental fat band. **(B)** Representative plots of CD19 and CD11b staining within gated CD45<sup>+</sup> cells. **(C)** Representative plots of CD11b and Ly6G staining within gated CD45<sup>+</sup> cells, showing abundance of neutrophils (CD11b<sup>+</sup>Ly6G<sup>+</sup>). **(D)** Numbers of neutrophils per omental fat band. **(E)** Numbers of dendritic cells (CD11c<sup>+</sup>MHCII<sup>+</sup>CD135<sup>+</sup>), NK cells (CD3<sup>-</sup>CD335<sup>+</sup>CD49b<sup>+</sup>), mast cells (FcεRIα<sup>+</sup>CD117<sup>+</sup>) and platelets (CD41<sup>+</sup>CD42d<sup>+</sup>) per omental fat band. Data in **A**, **D** and **E** was evaluated by Dunnett's multiple comparisons test compared to untreated mice for each given cell population.

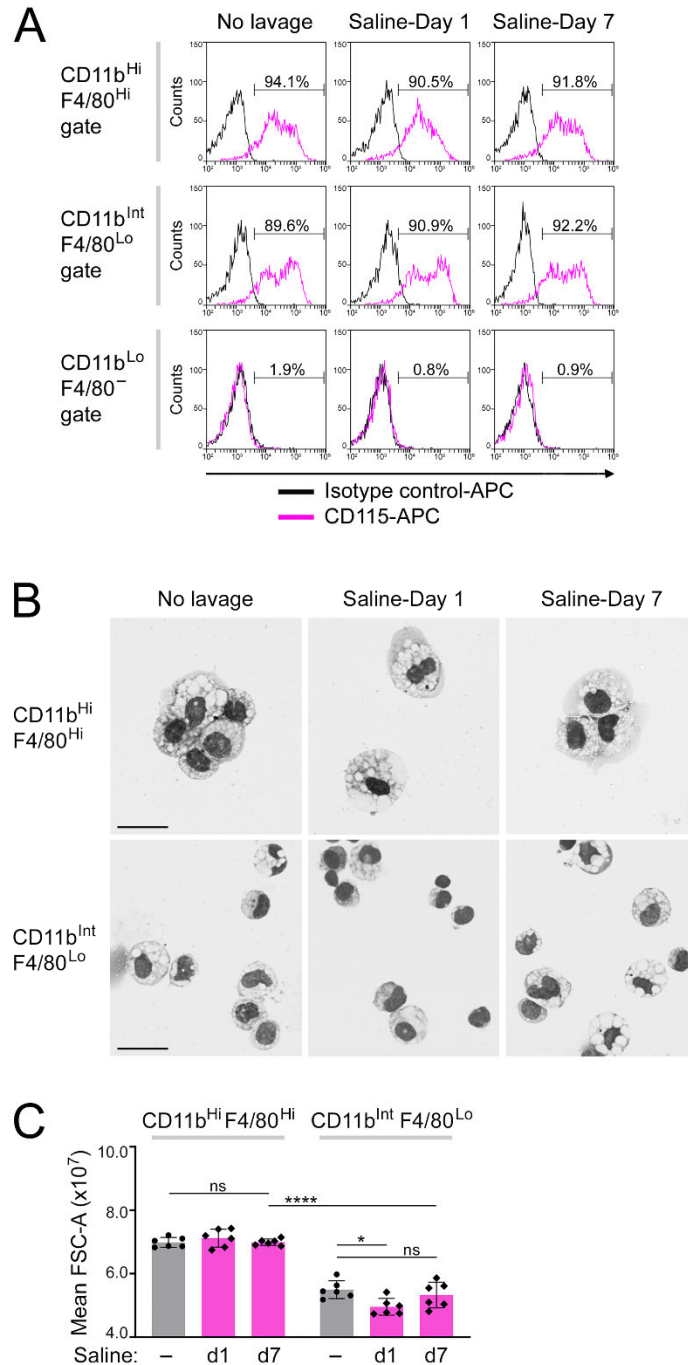

**Supplemental Figure 4. Morphology of omental monocyte/macrophage populations.**

Analysis of CD11b<sup>Hi</sup>F4/80<sup>Hi</sup> and CD11b<sup>Int</sup>F4/80<sup>Lo</sup> populations in omental tissues of untreated mice and at day 1 and day 7 following i.p. administration of normal saline. Adult female C57BL/6 mice were used. **(A)** Representative histogram plots of CD115 staining within gated CD11b<sup>Hi</sup>F4/80<sup>Hi</sup> and CD11b<sup>Int</sup>F4/80<sup>Lo</sup> populations. As a negative control, CD115 staining was evaluated within the gated CD11b<sup>Lo</sup>F4/80<sup>-</sup> population that is largely composed of peritoneal B-1 cells (refer Supplemental Figure 3B). **(B)** Morphology of CD11b<sup>Hi</sup>F4/80<sup>Hi</sup> and CD11b<sup>Int</sup>F4/80<sup>Lo</sup> cells that were sorted from omental tissues and stained with Giemsa solution. Scale bar, 20  $\mu$ m. **(C)** Relative sizes of CD11b<sup>Hi</sup>F4/80<sup>Hi</sup> and CD11b<sup>Int</sup>F4/80<sup>Lo</sup> cells, evaluated by forward scatter analysis. Data of  $n = 6$  mice per group is shown. \* $P < 0.05$ , \*\*\*\* $P < 0.0001$ , by Tukey's multiple comparisons test in **C**.

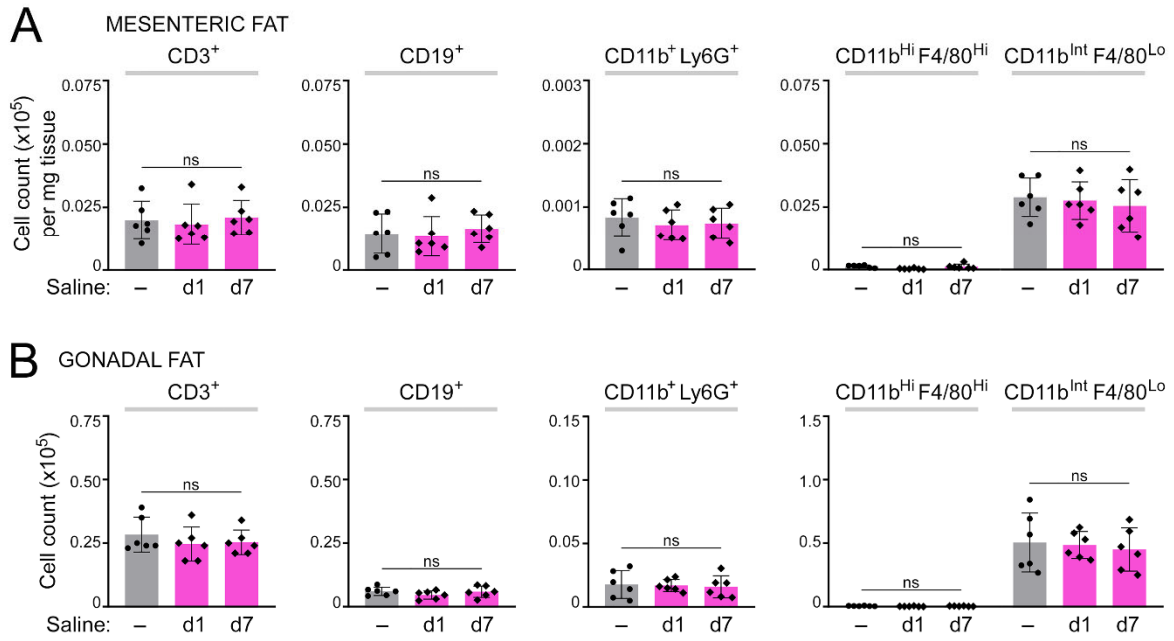

**Supplemental Figure 5. Effect of normal saline on immune cell populations in mesenteric and gonadal fat tissues.**

T cells (CD3<sup>+</sup>), B cells (CD19<sup>+</sup>), neutrophils (CD11b<sup>+</sup>Ly6G<sup>+</sup>) and monocytes/macrophages (CD11b<sup>Hi</sup>F4/80<sup>Hi</sup> and CD11b<sup>Int</sup>F4/80<sup>Lo</sup>) were evaluated in mesenteric and gonadal fat tissues of untreated mice and at day 1 and day 7 following i.p. administration of normal saline (*n* = 6 per group). Adult female C57BL/6 mice were used. (A) Numbers of cells in each population per mg of mesenteric fat tissue. (B) Numbers of cells in each population per gonadal fat pad (two lobes combined). Data in A and B was evaluated by Dunnett's multiple comparisons test compared to untreated mice for each given cell population.

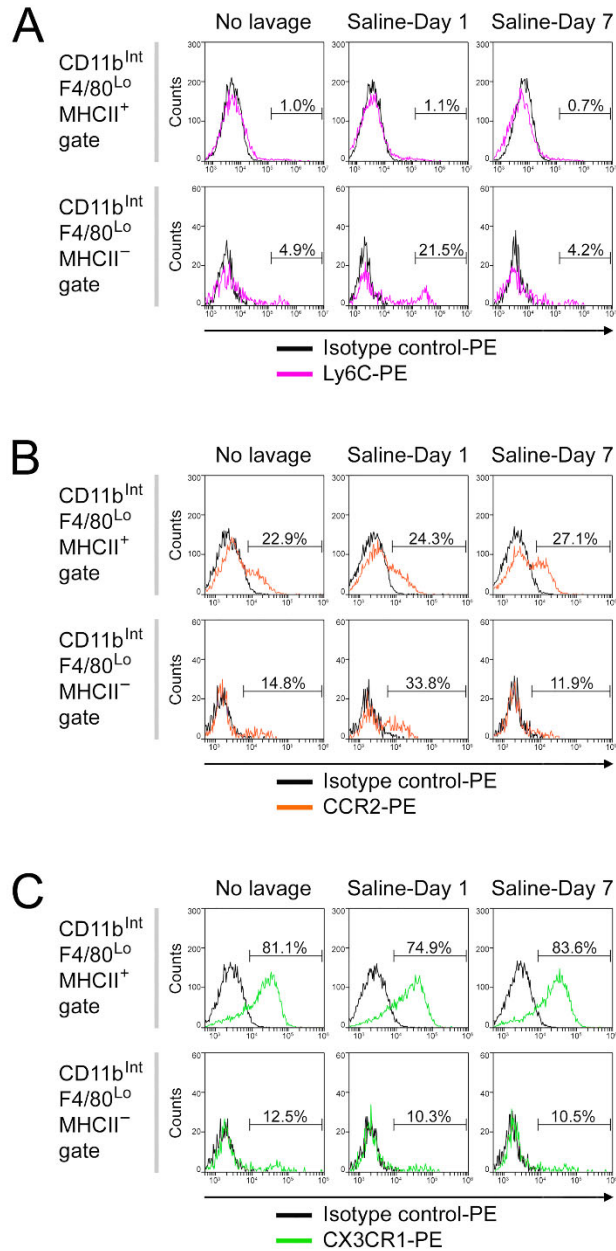

**Supplemental Figure 6. Distribution of Ly6C, CCR2 and CX3CR1 in CD11b<sup>Int</sup>F4/80<sup>Lo</sup> subpopulations.** Representative histogram plots of staining of (A) Ly6C, (B) CCR2 and (C) CX3CR1 within gated CD11b<sup>Int</sup>F4/80<sup>Lo</sup>MHCII<sup>+</sup> and CD11b<sup>Int</sup>F4/80<sup>Lo</sup>MHCII<sup>-</sup> subpopulations in omental tissues of untreated mice and at day 1 and day 7 following i.p. administration of normal saline. Gated populations are shown in Figure 3E. Adult female C57BL/6 mice were used.

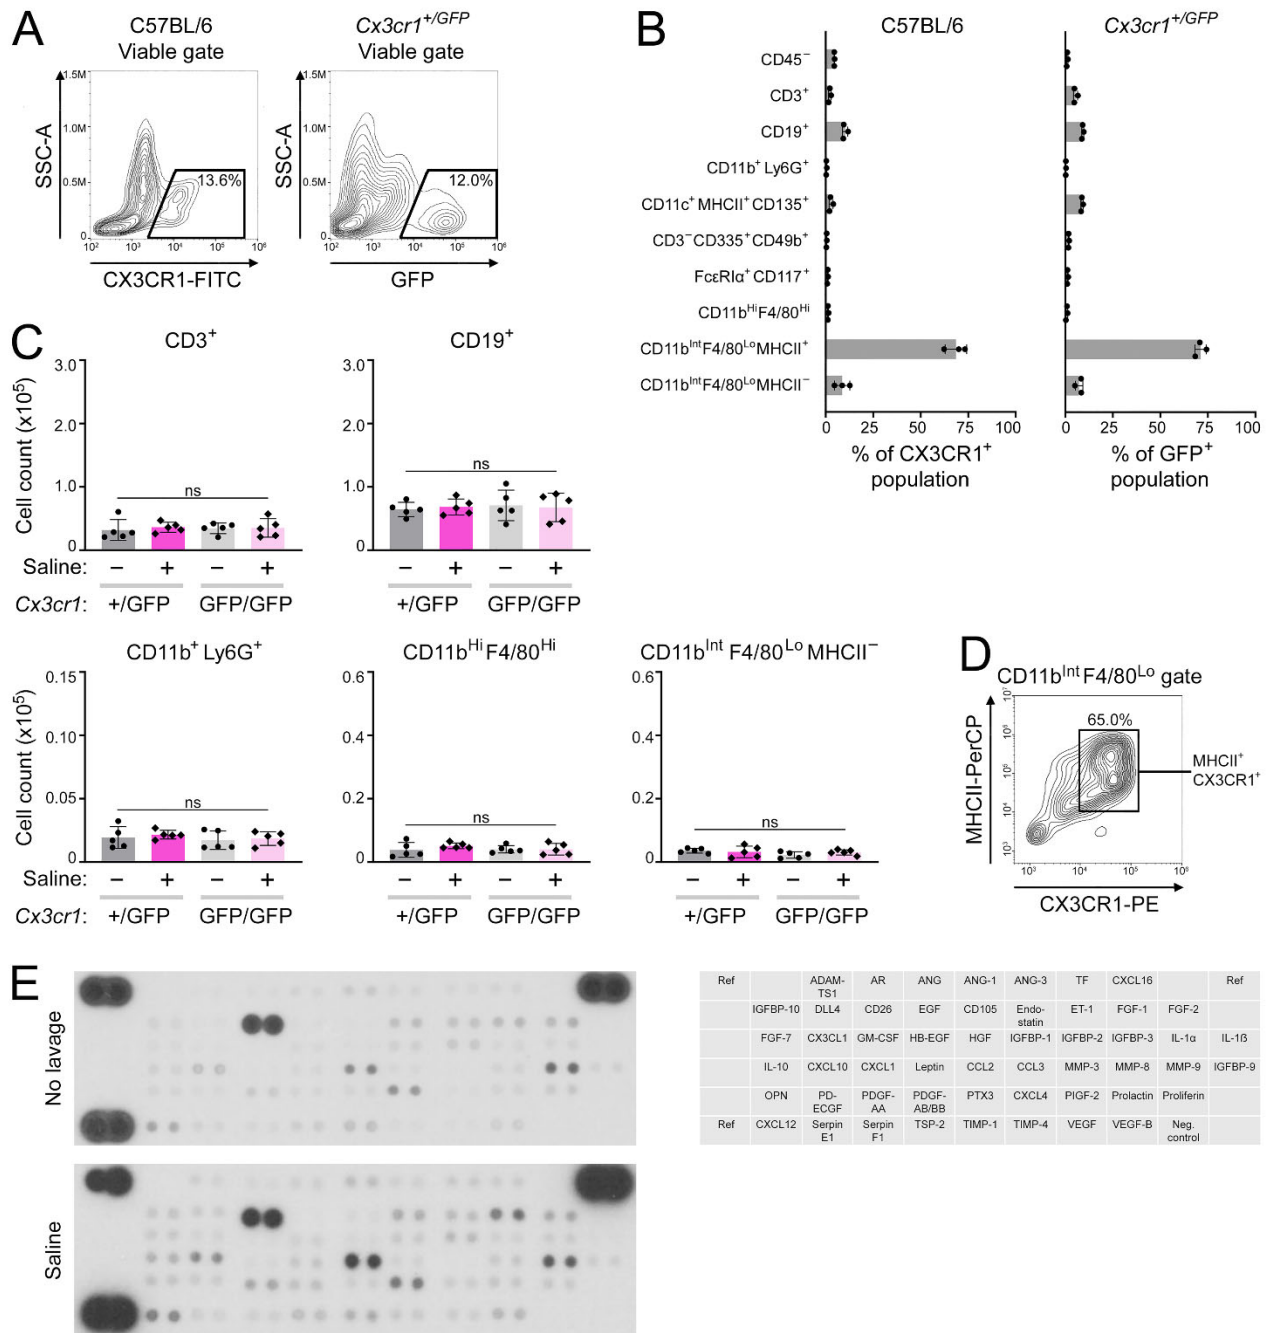

**Supplemental Figure 7. Analysis of *Cx3cr1*<sup>+/GFP</sup> and *Cx3cr1*<sup>GFP/GFP</sup> mice and CX3CR1<sup>+</sup> SPM-like cells.** (A and B) Comparison of CX3CR1<sup>+</sup> cells in the omentum of C57BL/6 mice and GFP<sup>+</sup> cells in the omentum of *Cx3cr1*<sup>+/GFP</sup> mice. (A) Gating strategy. (B) Percentages of cell types within the gated CX3CR1<sup>+</sup> population in C57BL/6 mice ( $n = 3$ ) and GFP<sup>+</sup> population in *Cx3cr1*<sup>+/GFP</sup> mice ( $n = 3$ ). (C) Adult female *Cx3cr1*<sup>+/GFP</sup> and *Cx3cr1*<sup>GFP/GFP</sup> mice were left untreated or administered normal saline, and evaluated at 7 days thereafter ( $n = 5$  per group). Shown are cell counts in the indicated immune cell populations per omental fat band. Data was evaluated by Tukey's multiple comparison test. (D-E) CD11b<sup>Int</sup>F4/80<sup>Lo</sup>MHCII<sup>+</sup>CX3CR1<sup>+</sup> cells were sorted from omental tissues of adult female C57BL/6 mice that were left untreated and at day 1 following saline administration ( $n = 5$  per group). Sorted cells of each group were then pooled. Lysates of  $2.5 \times 10^5$  pooled cells of each group were used to probe an antibody array representing 53 angiogenesis-associated proteins. (D) Gating strategy showing sorted population. (E) Signals detected on array membranes and corresponding proteins (2 replicate spots per protein). Reference (Ref) spots were used for normalization.



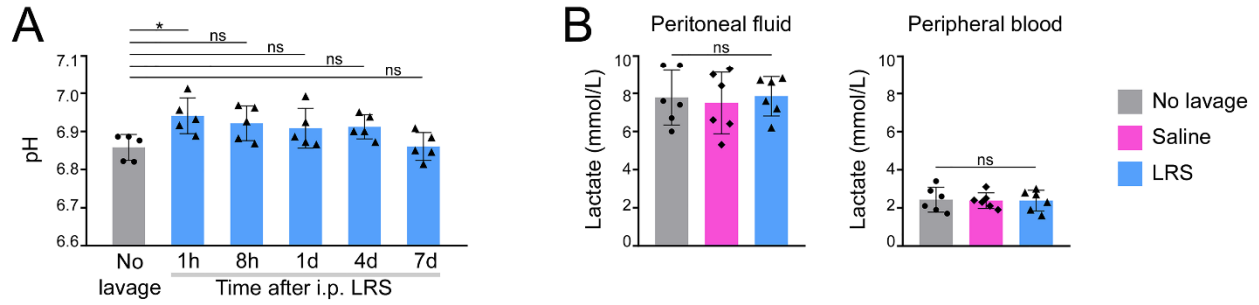

**Supplemental Figure 8. Effects of LRS on peritoneal pH and lactate levels.**

(A) pH in the peritoneal cavity of mice at 1 hour and 8 hours, and at 1, 4 and 7 days, following i.p. administration of LRS (12.5 mL/kg) ( $n = 5$  mice at each time-point). pH measurements were taken as described in Supplemental Figure 1A. Data of untreated mice is duplicated in Supplemental Figure 1A. (B) Lactate levels in peritoneal fluid and peripheral blood of untreated mice and at day 1 following i.p. administration of normal saline or LRS at the same dosage (12.5 mL/kg) ( $n = 6$  per group). Adult female C57BL/6 mice were used in A and B.  $*P < 0.05$ , by Dunnett's multiple comparisons test compared to untreated mice (no lavage) in A and B.

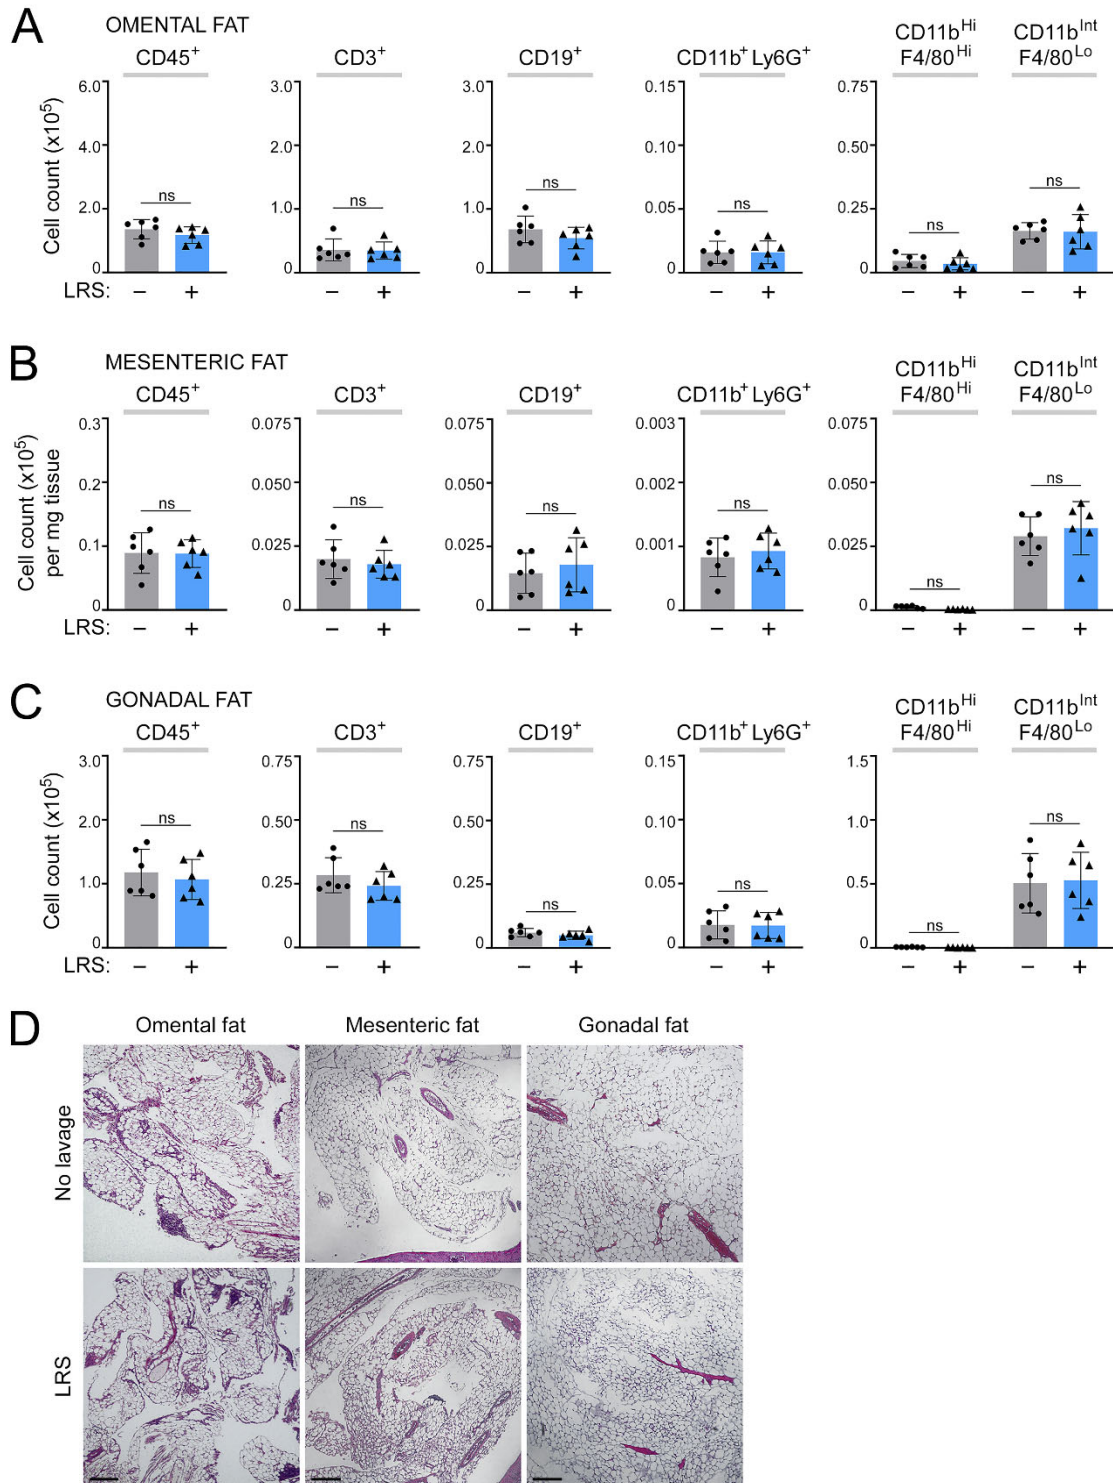

**Supplemental Figure 9. Effect of LRS on immune cell populations and histology of fat tissues.**

(A-C) Numbers of total immune cells, T cells, B cells, neutrophils and monocytes/macrophages in omental (A), mesenteric (B), and gonadal (C) fat tissues of untreated mice and at day 7 following i.p. administration of LRS ( $n = 6$  per group). Data of untreated mice in A is duplicated in Supplemental Figure 2D, 3A and 3D, and Figure 3D. Data of untreated mice in B and C is duplicated in Supplemental Figure 2D, 5A and 5B. (D) Representative H&E-stained tissue sections of untreated and LRS-treated mice. Scale bar, 200  $\mu$ m. Adult female C57BL/6 mice were used in A-D. Data in A-C was evaluated by unpaired two-tailed Student's *t*-test.

**Supplemental Table 1:  
Characteristics of body fluids, normal saline and LRS\***

|                              | Serum/<br>Plasma | Interstitial<br>fluids | Normal saline<br>(0.9% NaCl) | Lactated Ringer's<br>solution (LRS) |
|------------------------------|------------------|------------------------|------------------------------|-------------------------------------|
| Sodium (mmol/L)              | 136 - 145        | 136 - 145              | 154                          | 130                                 |
| Chloride (mmol/L)            | 102 - 108        | 108 - 118              | 154                          | 109                                 |
| Potassium (mmol/L)           | 4.0 - 5.1        | 3.5 - 5.0              | 0                            | 4.0                                 |
| Calcium (mmol/L)             | 1.3 - 2.5        | 1.2 - 2.8              | 0                            | 2.7                                 |
| Bicarbonate/Lactate (mmol/L) | 20 - 25          | 19 - 28                | 0                            | 28                                  |
| pH                           | 7.38 - 7.42      | 7.35 - 7.45            | 5.5                          | 6.5 - 6.75                          |
| Osmolarity (mOsmol/L)        |                  |                        | 308                          | 273                                 |
| Osmolality (mOsmol/kg)       | 280 - 296        | 280 - 296              | 286                          | 254                                 |

\*Data compiled from references 21, 42, 44-47.

**Supplemental Table 2:  
Sources and concentrations of antibodies**

| <b>Antibodies for immunohistochemistry and immunocytochemistry</b> |                  |                   |                   |                      |
|--------------------------------------------------------------------|------------------|-------------------|-------------------|----------------------|
| <b>Antibody</b>                                                    | <b>Clone #</b>   | <b>Vendor</b>     | <b>Identifier</b> | <b>Concentration</b> |
| CD31                                                               |                  | Abcam             | ab28364           | 0.065 µg/mL          |
| CD31                                                               | RM0032-1D12      | Abcam             | ab56299           | 5.0 µg/mL            |
| CD45                                                               | I3/2.3           | Abcam             | ab25386           | 1.0 µg/mL            |
| CX3CL1                                                             |                  | Invitrogen        | 14-7986-81        | 1.0 µg/mL            |
| Prox1                                                              | Poly19252        | BioLegend         | 925202            | 1.0 µg/mL            |
| NF-κB p65                                                          | D14E12           | Cell Signal.Tech. | 8242T             | 0.5 µg/mL            |
| TurboGFP                                                           |                  | Invitrogen        | PA5-22688         | 5.0 µg/mL            |
| Wilms Tumor Protein (WT1)                                          | CAN-R9(IHC)-56-2 | Abcam             | ab89901           | 4.4 µg/mL            |
| ZO-1                                                               | ZO1-1A12         | Invitrogen        | 33-9100           | 5.0 µg/mL            |
| Alexa Fluor® 488 Goat anti-rabbit IgG (H+L)                        |                  | Invitrogen        | A-11008           | 2.0 µg/mL            |
| Alexa Fluor® 488 Goat anti-rat IgG (H+L)                           |                  | Invitrogen        | A-11006           | 2.0 µg/mL            |
| Alexa Fluor® 594 Goat anti-rabbit IgG (H+L)                        |                  | Invitrogen        | A-11012           | 2.0 µg/mL            |
| Alexa Fluor® 594 Goat anti-rat IgG (H+L)                           |                  | Invitrogen        | A-11007           | 2.0 µg/mL            |
| <b>Antibodies for flow cytometry</b>                               |                  |                   |                   |                      |
| <b>Antibody</b>                                                    | <b>Clone #</b>   | <b>Vendor</b>     | <b>Identifier</b> | <b>Concentration</b> |
| FITC-CD45                                                          | 30-F11           | BioLegend         | 103108            | 0.5 µg/mL            |
| FITC-F4/80                                                         | BM8              | BioLegend         | 123108            | 5.0 µg/mL            |
| FITC-CX3CR1                                                        | SA011F11         | BioLegend         | 149020            | 5.0 µg/mL            |
| Alexa Fluor® 488-CD102 (ICAM2)                                     | 3C4 (MIC2/4)     | BioLegend         | 105609            | 5.0 µg/mL            |
| Alexa Fluor® 488-PDPN                                              | PMab-1           | BioLegend         | 156208            | 5.0 µg/mL            |
| PE-PDPN                                                            | 8.1.1            | BioLegend         | 127408            | 2.0 µg/mL            |
| PE-F4/80                                                           | BM8              | BioLegend         | 123110            | 1.0 µg/mL            |
| PE-CD19                                                            | 1D3/CD19         | BioLegend         | 152408            | 1.0 µg/mL            |
| PE-Ly6G                                                            | 1A8              | BioLegend         | 127608            | 1.0 µg/mL            |
| PE-CD135                                                           | A2F10            | BioLegend         | 135306            | 4.0 µg/mL            |
| PE-CD49b                                                           | DX5              | BioLegend         | 108908            | 2.0 µg/mL            |
| PE-FcεR1α                                                          | MAR-1            | BioLegend         | 134307            | 2.0 µg/mL            |
| PE-CD42d                                                           | 1C2              | BioLegend         | 148504            | 4.0 µg/mL            |
| PE-Ly6C                                                            | HK1.4            | BioLegend         | 128008            | 2.0 µg/mL            |
| PE-CX3CR1                                                          | SA011F11         | BioLegend         | 149006            | 2.0 µg/mL            |
| PE-CCR2                                                            | SA203G11         | BioLegend         | 150610            | 2.0 µg/mL            |
| PE-CD31                                                            | 390              | BioLegend         | 102408            | 2.0 µg/mL            |
| PE-CD115                                                           | AFS98            | BioLegend         | 135505            | 2.0 µg/mL            |
| PE-CD11b                                                           | M1/70            | BioLegend         | 101207            | 2.0 µg/mL            |
| PerCP/Cy5.5-CD3                                                    | 17A2             | BioLegend         | 100218            | 2.0 µg/mL            |
| PerCP/Cy5.5-I-A/I-E (MHCII)                                        | M5/114.15.2      | BioLegend         | 107626            | 0.5 µg/mL            |
| PerCP/Cy5.5-CD45                                                   | 30-F11           | BioLegend         | 103132            | 0.2 µg/mL            |
| PerCP/Cy5.5-CD41                                                   | MWRReg30         | BioLegend         | 133918            | 2.0 µg/mL            |
| PerCP-CD11b                                                        | M1/70            | BioLegend         | 101228            | 2.0 µg/mL            |
| APC-CD140a                                                         | APA5             | BioLegend         | 135908            | 4.0 µg/mL            |
| APC-CD11b                                                          | M1/70            | BioLegend         | 101212            | 2.0 µg/mL            |
| APC-CD3                                                            | 17A2             | BioLegend         | 100236            | 2.0 µg/mL            |
| APC-CD11c                                                          | N418             | BioLegend         | 117309            | 2.0 µg/mL            |

|                                             |          |             |             |               |
|---------------------------------------------|----------|-------------|-------------|---------------|
| APC-CD335                                   | 29A1.4   | BioLegend   | 137608      | 4.0 µg/mL     |
| APC-CD117                                   | 2B8      | BioLegend   | 105811      | 4.0 µg/mL     |
| APC-CD115                                   | AFS98    | BioLegend   | 135509      | 2.0 µg/mL     |
| APC-F4/80                                   | BM8      | BioLegend   | 123116      | 2.0 µg/mL     |
| APC-CX3CL1                                  | 126315   | R&D Systems | FAB571A-025 | 2.5 µg/mL     |
| Purified anti-mouse CD16/32                 | 93       | BioLegend   | 101302      | 5.0 µg/mL     |
| FITC-Mouse IgG2a isotype control            | MOPC-173 | BioLegend   | 400208      | 5.0 µg/mL     |
| FITC-Rat IgG2a isotype control              | RTK2758  | BioLegend   | 400505      | 5.0 µg/mL     |
| FITC-Rat IgG2b isotype control              | RTK4530  | BioLegend   | 400606      | 0.5 µg/mL     |
| Alexa Fluor® 488- Rat IgG2a isotype control | RTK2758  | BioLegend   | 400525      | 5.0 µg/mL     |
| PE-Armenian Hamster IgG isotype control     | HTK888   | BioLegend   | 400908      | 2.0-4.0 µg/mL |
| PE-Syrian Hamster IgG isotype control       | SHG-1    | BioLegend   | 402008      | 2.0 µg/mL     |
| PE-Mouse IgG2a Isotype control              | MOPC-173 | BioLegend   | 400212      | 2.0 µg/mL     |
| PE-Rat IgG2a isotype control                | RTK2758  | BioLegend   | 400508      | 1.0-4.0 µg/mL |
| PE-Rat IgG2b isotype control                | RTK4530  | BioLegend   | 400608      | 2.0 µg/mL     |
| PE-Rat IgG2c isotype control                | RTK4174  | BioLegend   | 400707      | 2.0 µg/mL     |
| PE-Rat IgM isotype control                  | RTK2118  | BioLegend   | 400808      | 2.0 µg/mL     |
| PerCP/Cy5.5-Rat IgG1 isotype control        | RTK2071  | BioLegend   | 400426      | 2.0 µg/mL     |
| PerCP/Cy5.5-Rat IgG2b isotype control       | RTK4530  | BioLegend   | 400632      | 0.2-2.0 µg/mL |
| APC-Armenian Hamster IgG isotype control    | HTK888   | BioLegend   | 400911      | 2.0 µg/mL     |
| APC-Rat IgG2a isotype control               | RTK2758  | BioLegend   | 400511      | 2.0-4.0 µg/mL |
| APC-Rat IgG2b isotype control               | RTK4530  | BioLegend   | 400612      | 2.0-4.0 µg/mL |
